# Supplementary material for: Psychodynamic Therapy and Cognitive-Behavioral Therapy in Social Anxiety Disorder: A Multicenter Randomized Controlled Trial
Source: Atypon-hosted journal article supplement (doi:10.1176/appi.ajp.2013.12081125), 2013-05-17
Supplement: 759_ds001.pdf [file 759_ds001.pdf]

**FIGURE S1. Enrollment and Outcomes**

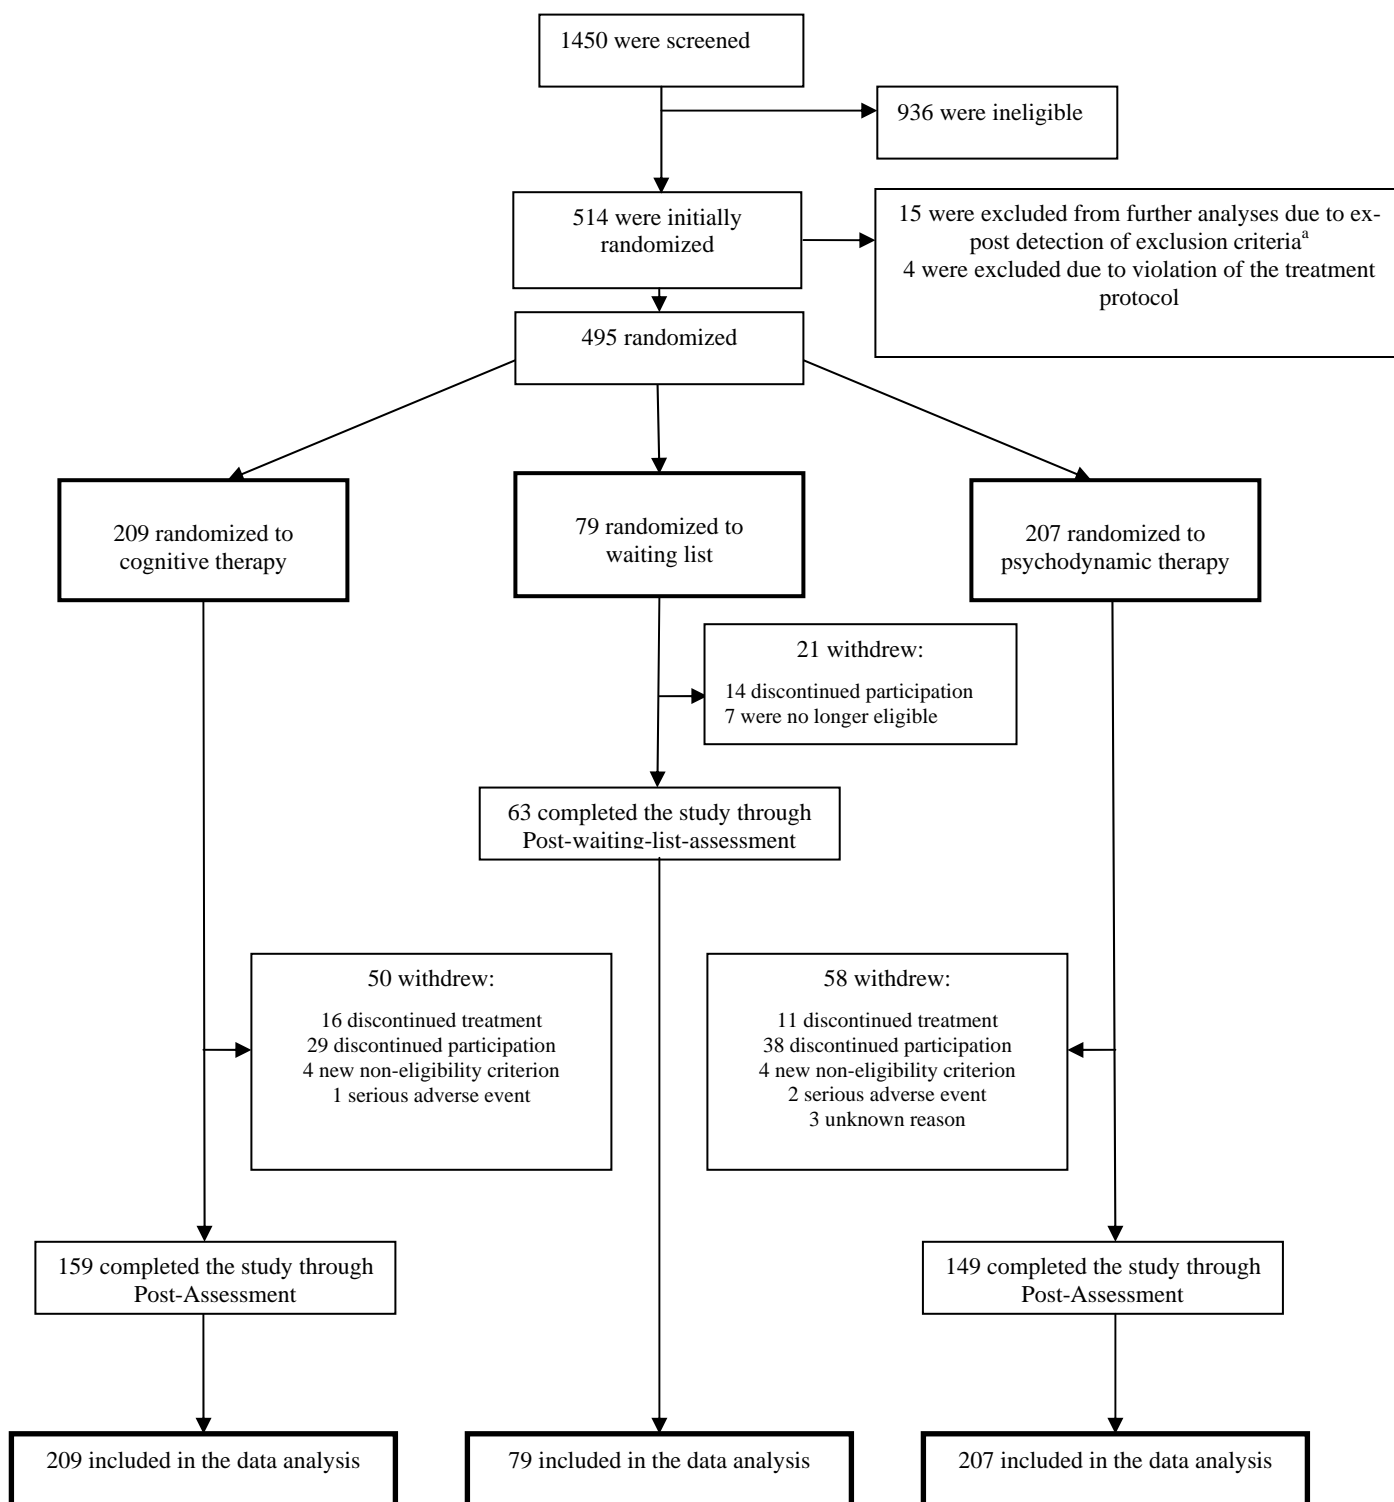

<sup>a</sup> The reasons for the 15 exclusions were as follows: in cognitive therapy (N=7): social phobia was not the primary diagnosis (N=2), substance-related disorders (N=3), antidepressant medication (N=1), borderline personality disorder (N=1); in psychodynamic therapy (N=7): use of benzodiazepine (N=1), brain cancer (N=1), schizophrenia, schizotypal, or delusional disorders (N=3), substance-related disorders (N=2); and in waiting list: (N=1) an eating disorder was the primary diagnosis.
